# Supplementary material
Source: publisher figshare collection journal article supplement (https://rs.figshare.com/ndownloader/files/13193936)
Supplement: Supplementary file 1 [file 13193936]

**Electronic supplementary material**

Paper titled: “***Simultaneous Measurements of Three-Dimensional Trajectories and Wingbeat Frequencies of Birds in the Field***”

**Authors:** *Hangjian Ling1, Guillam E. Mclvor2, Geoff Nagy3, Sepehr MohaimenianPour3, Richard T. Vaughan3, Alex Thornton2, Nicholas T. Ouellette1*

1Department of Civil and Environmental Engineering, Stanford University, Stanford, CA USA;

2Center for Ecology and Conservation, University of Exeter, Penryn, UK;

3School of Computing Science, Simon Fraser University, Burnaby, Canada

Accepted for publication at ***Journal of Royal Society Interface***

| Wingbeat frequency (Hz) | |
| --- | --- |
| Rooks | Jackdaws |
| 2.9 | 4.8 |
| 2.6 | 4.7 |
| 2.8 | 5 |
| 4.9 | 2.9 |
| 3.0 | 2.8 |
| 5.5 | 5.3 |
| 2.8 | 5.6 |
| 2.9 | 4.6 |
|  | 2.6 |
|  | 3.0 |
|  | 4.9 |
|  | 4.7 |
| 3.4±0.4 | 4.2±0.3 |

Table S1. Wingbeat frequencies for 12 jackdaws and 8 rooks flying in mixed-species flocks. The birds’ species was manually identified on the basis of visible morphological characteristics. Each value is obtained by averaging over the flapping modes. The last column shows the mean values and standard errors of wingbeat frequencies for each species.
